# Supplementary material for: A Review and Experimental Revisit of Alternative Catalysts for Selective Oxidation of Methanol to Formaldehyde
Source: MDPI journal article supplement (doi:10.3390/catal11111329), 2021-10-31
Supplement: s1 [file s1]

Archive with 1 entries (1 files):
- catalysts-1413531-supplementary.pdf
